# Supplementary material
Source: MDPI journal article supplement (https://www.mdpi.com/2071-1050/14/17/10590)
Supplement: s1 [file s1]

Archive with 2 entries (2 files):
- File S1 Supplementary TablesS1S2S3.pdf
- File S2 Farmerdata.xlsx
