# Supplementary material
Source: MDPI journal article supplement (https://www.mdpi.com/2071-1050/14/17/10590)
Supplement: s1 [file s1 › File S2 Farmerdata.xlsx]

## Sheet: Semi-organic farmer responses
Participant Number	Gender	Age	Education	Income source	Income bracket	Type of farming	Fertilizer used	Type of irrigation water used	Pre-treatment of fertilizer	Pre-treatment of irrigation water	Harvest time	Knowledge on produce quality
1	2	4	4	3	3	1	1	2	1	2	4	1
2	2	3	4	4	4	2	1	2	1	2	1	1
3	2	4	4	4	3	1	1	2	1	2	1	1
4	2	5	4	5	1	1	1	6	1	2	1	2
5	2	4	3	7	3	1	1	2	1	2	1	2
6	2	6	4	3	3	1	1	2	1	2	1	2
7	2	5	4	4	1	2	5	4	2	2	5	1
8	1	4	4	4	2	1	1	2	1	2	4	2
9	2	4	4	4	2	2	5	6	2	2	1	1
10	2	5	4	7	1	2	5	6	2	2	1	1
11	1	6	3	3	2	1	5	5	1	2	1	2
12	1	6	3	3	2	1	5	5	1	2	1	2
13	1	6	3	3	2	1	5	5	1	1	1	2
14	2	5	2	3	3	1	1	6	1	2	5	1
15	2	5	3	7	2	1	1	6	1	2	5	1
16	2	5	4	4	1	2	2	2	1	2	1	2
17	2	5	4	3	3	2	2	2	2	2	1	2
18	1	2	4	1	1	2	6	5	1	1	1	1
19	2	4	3	8	3	2	6	6	2	2	5	1
20	2	4	3	7	3	2	2	6	2	1	5	1
21	2	5	1	7	3	2	6	6	2	1	4	1
22	2	4	1	2	4	2	1	6	2	2	4	1
23	2	5	1	2	2	2	2	4	2	2	4	1
24	2	5	3	7	3	1	2	4	2	2	4	1
25	2	6	3	7	4	1	1	4	2	2	4	1
26	2	3	4	8	4	2	1	4	1	2	5	1
27	2	5	4	7	3	2	1	6	2	2	5	1
28	2	6	1	3	4	2	1	6	1	1	1	1
29	2	6	1	7	3	2	6	2	2	2	4	1
30	2	4	4	5	3	2	2	2	2	2	4	2
31	2	4	4	8	1	2	2	2	2	2	4	2
32	1	6	4	4	1	1	6	2	1	2	1	2
33	2	6	3	7	2	1	6	2	2	2	5	1
34	1	4	1	7	3	1	1	6	1	1	1	2
35	2	5	3	2	2	2	5	2	1	2	4	1
36	2	3	3	7	3	2	6	2	2	2	1	1
37	2	6	2	1	3	2	1	2	1	1	1	1
38	2	5	2	3	3	1	2	2	1	1	1	1
39	2	6	3	4	1	2	6	2	2	1	1	1
40	2	6	3	4	1	2	2	2	2	1	1	2

## Sheet: Organic Farmer responses
Participant number	Gender	Age	Education	Income bracket	Income source	Type of farming practiced	Fertilizer used	Type of irrigation water used	Pre-treatment of manure	Pre-treatment of irrigation water	Harvest time	Knowledge on Produce quality
1	1	3	4	4	4	2	5	n/a	1	2	1	2
2	1	3	4	4	5	2	5	n/a	1	2	1	1
3	2	3	4	4	5	2	5	n/a	1	2	1	2
4	2	3	4	4	5	2	5	n/a	1	2	1	2
5	2	3	4	4	5	2	5	n/a	1	2	1	2
6	2	5	3	4	5	2	5	n/a	1	2	1	2

## Sheet: Semiconventional farmer respons
Participant number	Gender	Age	Education	Income bracket	Income source	Type of farming practiced	Fertilizer used	Type of irrigation water used	Pre-treatment of manure	Pre-treatment of irrigation water	Harvest time	Knowledge of produce quality
1	1	3	4	4	5	1	1	n/a	1	2	4	1
2	1	3	4	4	5	1	1	n/a	1	2	4	1
3	1	3	4	4	5	1	1	n/a	2	2	4	1
4	1	3	4	4	5	1	1	n/a	2	2	4	1
5	1	3	4	4	5	1	1	n/a	2	2	4	1
